# Supplementary material for: Enhancing the reversibility of the chemical evolution of the Ni-rich LiNi 0.8 Co 0.1 Mn 0.1 O 2 cathode via a simple pre-oxidation process
Source: Royal Society of Chemistry journal article supplement (doi:10.1039/d3ra07178b), 2024-01-01
Supplement: d3ra07178b1.pdf [file d3ra07178b1.pdf]

## Supplementary Information

Enhancing the reversibility of the chemical evolution for Ni-rich

$\text{LiNi}_{0.8}\text{Co}_{0.1}\text{Mn}_{0.1}\text{O}_2$  cathode via a simple pre-oxidation process

Yan Mo<sup>a, b†</sup>, Shaofeng Liu<sup>a, b†</sup>, ZiKun Li<sup>b\*</sup>, Lingjun Guo<sup>c\*</sup>, Meng Zhang<sup>b</sup>,

Yauanyuan Ren<sup>c</sup>, Guohui Yuan<sup>a, b\*</sup>

<sup>a</sup> School of Chemistry and Chemical Engineering, Harbin Institute of Technology, Harbin 150001, People's Republic of China

<sup>b</sup> Shenzhen BTR nanotechnology Co., Ltd., Shenzhen 518106, People's Republic of China.

<sup>c</sup> State Key Laboratory of Solidification Processing, Northwestern Polytechnical University, Xi'an 710072, China

\* E-mail address: lizikun@btrchina.com, ygh@hit.edu.cn, guolingjun@nwpu.edu.cn

† The first and second authors contributed equally.

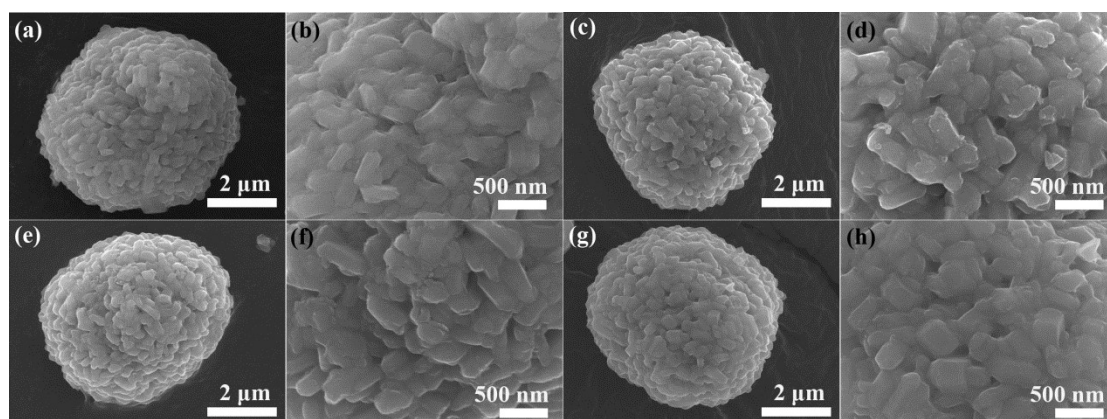

Fig. S1 The SEM images of the N-NCM (a-b), H-1 (c-d), H-2 (e-f) and H-3 (g-h) samples.

Table S1. The chemical compositions of N-NCM, H-1, H-2, H-3.

| Sample | Li<br>(g·mL <sup>-1</sup> ) | Ni<br>(g·mL <sup>-1</sup> ) | Co<br>(g·mL <sup>-1</sup> ) | Mn<br>(g·mL <sup>-1</sup> ) | Formula                                                                          |
|--------|-----------------------------|-----------------------------|-----------------------------|-----------------------------|----------------------------------------------------------------------------------|
| N-NCM  | 7.44                        | 48.3                        | 6.64                        | 5.43                        | $\text{Li}_{1.036}\text{Ni}_{0.796}\text{Co}_{0.109}\text{Mn}_{0.096}\text{O}_2$ |
| H-1    | 8.39                        | 54.8                        | 7.35                        | 6.38                        | $\text{Li}_{1.029}\text{Ni}_{0.795}\text{Co}_{0.106}\text{Mn}_{0.099}\text{O}_2$ |
| H-2    | 7.86                        | 52.4                        | 6.51                        | 5.94                        | $\text{Li}_{1.019}\text{Ni}_{0.803}\text{Co}_{0.099}\text{Mn}_{0.097}\text{O}_2$ |
| H-3    | 6.36                        | 42.6                        | 5.45                        | 4.82                        | $\text{Li}_{1.011}\text{Ni}_{0.801}\text{Co}_{0.102}\text{Mn}_{0.097}\text{O}_2$ |

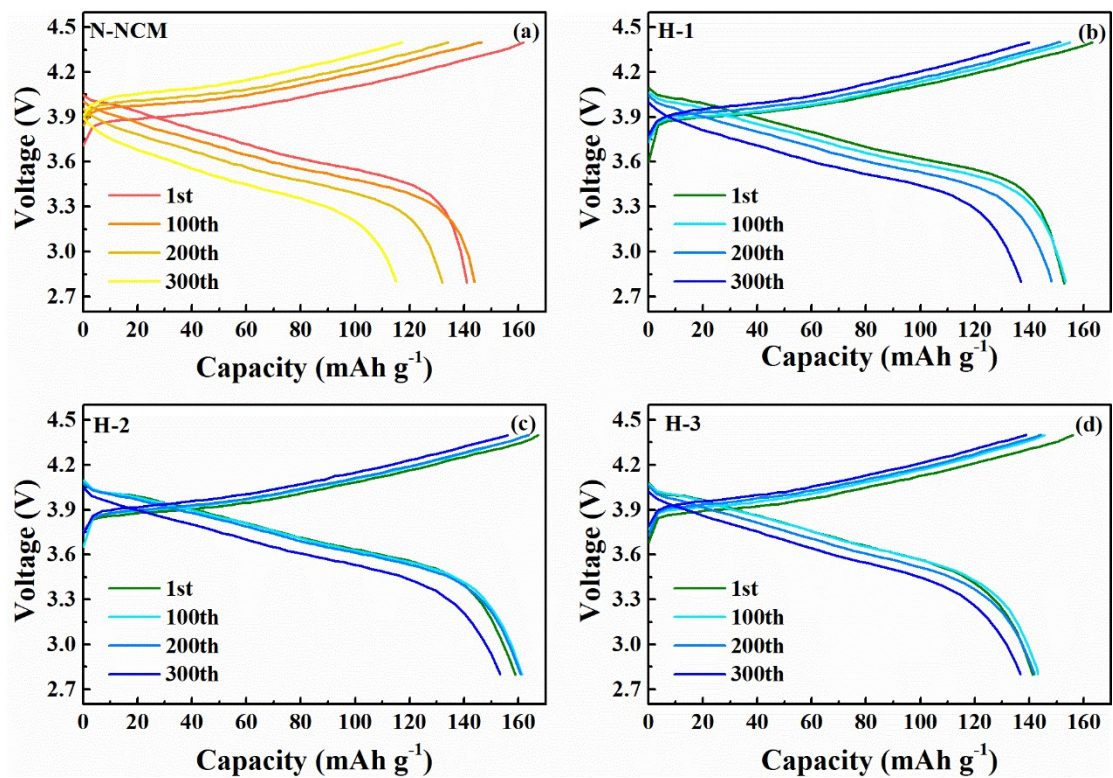

Fig. S2 The charge and discharge profiles at first, 100<sup>th</sup>, 200<sup>th</sup> and 300<sup>th</sup> cycle: (a) N-NCM, (b) H-1, (c) H-2, (d) H-3.

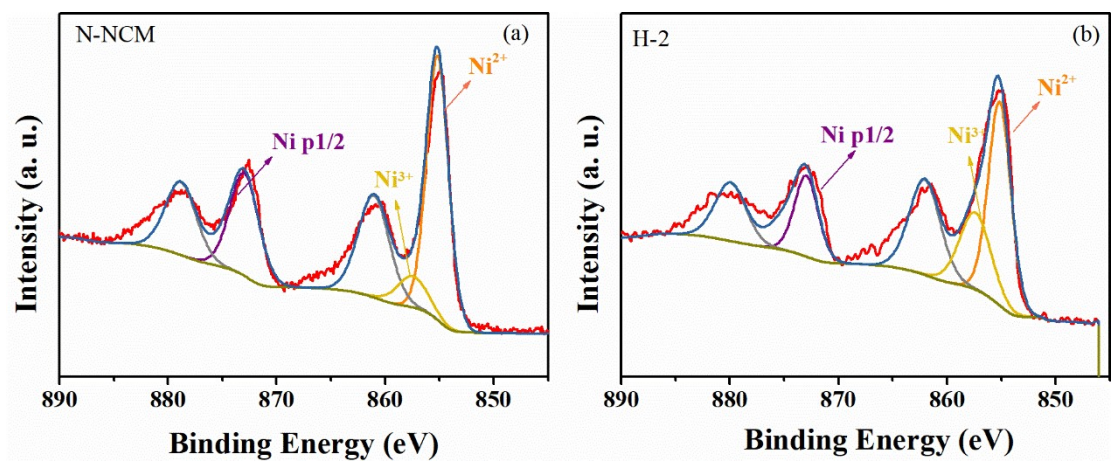

Fig. S3 The XPS result of the precursor of N-NCM (a) and H-2 (b).
